# Supplementary material for: Association of Placental Mitochondrial DNA Mutations on Infant Negative Affectivity: Modifying Effects of Maternal Lifetime Stress and Infant Sex
Source: Research Square preprint supplement (doi:10.21203/rs.3.rs-5806105/v1), 2025-05-06
Supplement: Supplementary file 1 [file 0f39ac9083b61708d80520bf.xlsx]

## Sheet: Sheet1
			Characteristics by Child Sex				by Maternal Stress
		Total Sample (N= 396)	Female (n=180)	Male (n=226)	p-value		High Stress (n=171)	Low Stress (n=192)	p-value
	Child Sex
	Female (%)	170 (43%)					68 (40)	90 (47)	0.2
	Male (%)	226 (57%)					103 (60)	102 (53)
	Maternal Haplogroup
	African	204 (51.5%)	87 (21)	117 (21)	0.97		94 (55)	95 (49.5)	0.35
	European	83 (21%)	35 (51)	48 (52)	0.87		31 (18)	47 (24.5)	0.18
	Native American/Indian	109 (27.5%)	48 (28)	61 (27)	0.99		46 (27)	50 (26)	0.95
	Maternal Ethnicity
	Hispanic	126 (32.5%)	57 (34)	69 (31)	0.53		60 (35.3)	57 (30)	0.27
	Maternal Education
	≤ High School Diploma	148 (37.4%)	69 (41)	79 (35)	0.3		70 (41)	69 (36)	0.28
	Mean Maternal Age at Birth, Years	29.4 (5.66)	29.4 (5.88)	29.3 (5.5)	0.95		28.7 (5.44)	29.8 (5.89)	0.1
	High Maternal Lifetime Stress (>Median)	171 (47)	68 (18.7)	103 (28.4)	0.2
	Maternal Lifetime Stress (Median, IQR)	9 (4-17)	9 (4-16)	10 (5-17)	0.1		18 (13-26)	4.5 (3-7)	--
	Values are n (%) or mean ± SD.
			z
